# Supplementary material for: Cyclin-dependent Kinase 1 and Aurora Kinase choreograph mitotic storage and redistribution of a growth factor receptor
Source: PLOS journal article supplement (doi:10.1371/journal.pbio.3001029), 2021-01-04
Supplement: S5 (10.1371/journal.pbio.3001029.s005) [file journal.pbio.3001029.s005]

S5 Fig

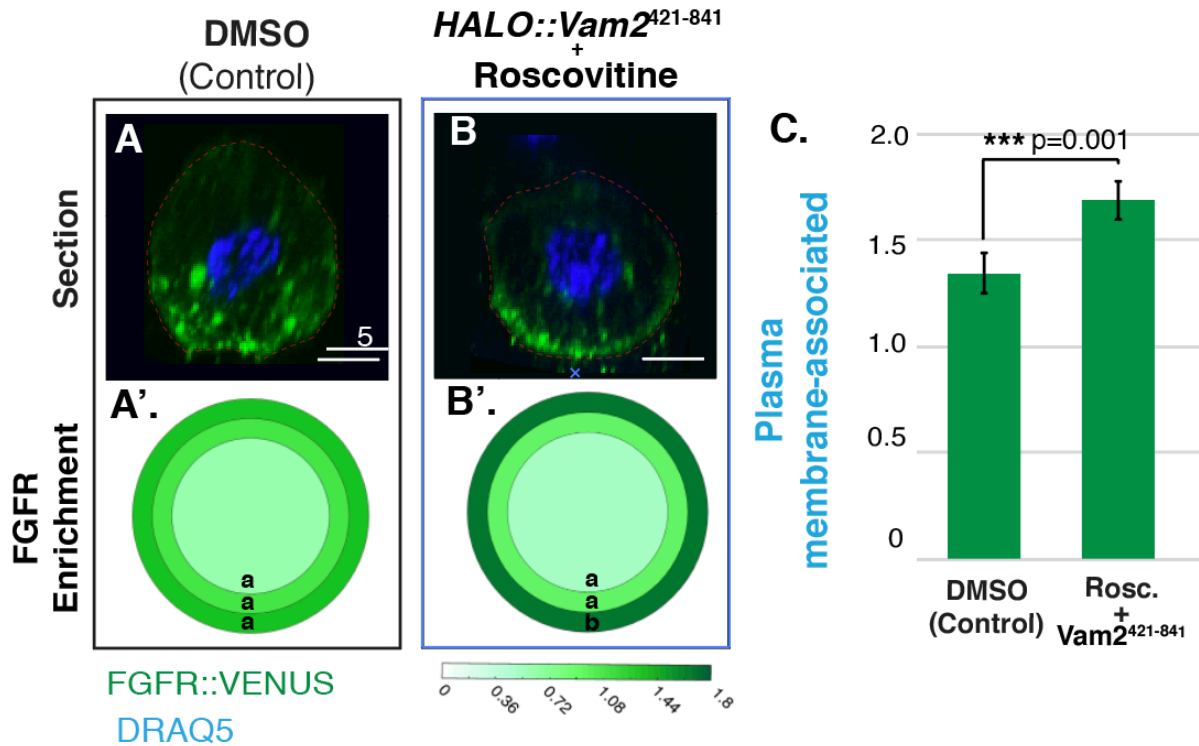

**S5 Fig. Inhibition of both CDK1 Kinase activity and lysosomal degradation increases the plasma membrane-associated enrichment of FGF receptors.** (A-B') Lateral sections and graphical summary of regional FGFR::VENUS enrichment for founder cells electroporated with *Mesp>FGFR::Venus* alone or in combination with *Mesp>HALO::Vam2<sup>421-841</sup>* and treated with vehicle (DMSO) or roscovitine (14 $\mu$ mol/L) as indicated. *Mesp>HALO::Vam2<sup>421-841</sup>* alone also resulted in a modest, but not significant, increase in plasma membrane-associated FGFR::VENUS. Because phalloidin staining obscures FGFR::VENUS localization, red dashed lines were used to indicate phalloidin stained cell membranes (A-B). Some regions are labeled with an a or b to denote significant changes ( $p < 0.05$ ) that occurred within this region across stages. Other regions are labeled n.s. to denote that no significant changes occurred for the indicated stages. Significance was determined using one-way ANOVA followed by Tukey's multiple comparison test. (C) Quantification of the FGFR::VENUS enrichment in the plasma membrane-associated region of founder cells electroporated and treated as indicated. Significance was determined using one-way ANOVA followed by Tukey's multiple comparison test. Numerical values for all graphs can be found in S10 Data. Scale bars are indicated in micrometers.
